# Supplementary material for: Diagnostic Potential of a PPE Protein Derived from Mycobacterium tuberculosis Beijing/K Strain
Source: PubMed Central journal article supplement — Yonsei Med J. 2020 Aug 27;61(9):789–96. doi: 10.3349/ymj.2020.61.9.789 (PMC7471075; doi:10.3349/ymj.2020.61.9.789), 2020-08-27
Supplement: ymj-61-789-s002.pdf [file ymj-61-789-s002.pdf]

MTBK\_24820

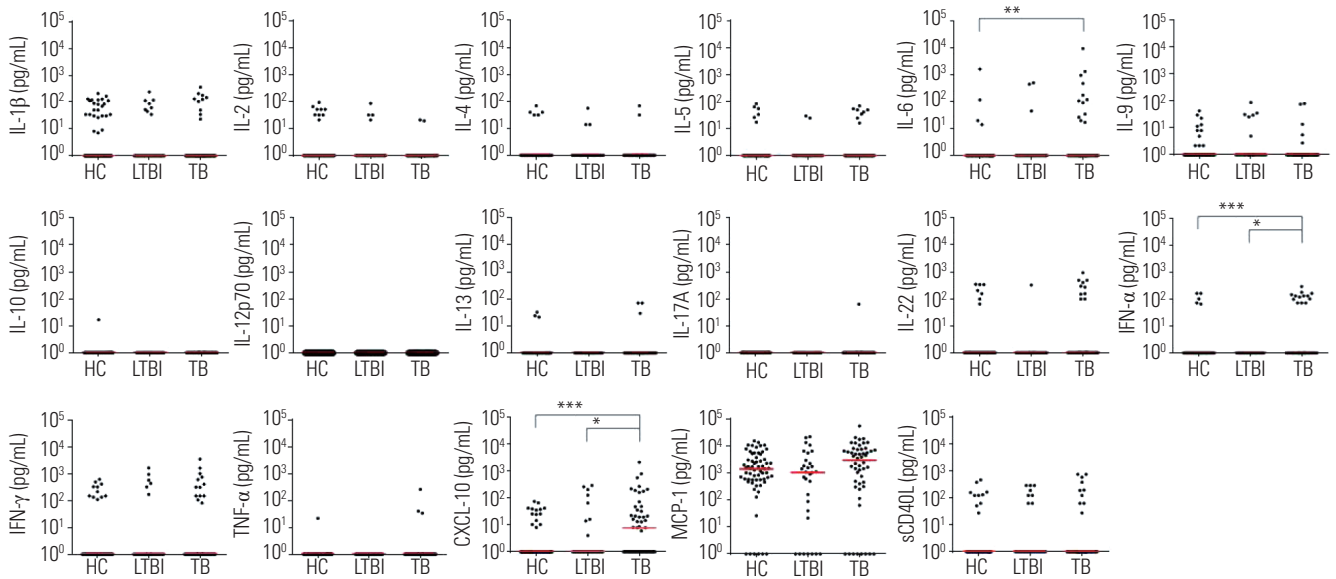

**Supplementary Fig. 2.** Immune signatures of MTBK\_24820-specific cytokine/chemokine responses in diagnostic groups using multiplex bead arrays. Culture supernatant samples stimulated with MTBK\_24820 were analyzed with the following 17 different cytokines and chemokines: IL-1 $\beta$ , IL-2, IL-4, IL-5, IL-6, IL-9, IL-10, IL-12p70, IL-13, IL-17A, IL-22, IFN- $\alpha$ , IFN- $\gamma$ , TNF- $\alpha$ , IP-10 (CXCL10), MCP-1 (CCL2), and sCD40L. Median responses are marked by red lines (\* $p$ <0.05, \*\* $p$ < 0.01, \*\*\* $p$ <0.001, by one-way ANOVA with subsequent Kruskal-Wallis test). HC, healthy control; LTBI, latent TB infection; TB, tuberculosis; IFN, interferon; IL, interleukin; CXCL10, C-X-C motif chemokine; TNF, tumor necrosis factor.
